# Supplementary material for: Brain-derived neurotrophic factor increases cell number of neural progenitor cells derived from human induced pluripotent stem cells
Source: PeerJ journal article supplement (doi:10.7717/peerj.11388), 2021-05-12
Supplement: Neurite_length-raw.xlsx [file Neurite_length-raw.xlsx]

## Sheet: Neurite length (Ctrl1)
Ctrl1
Conditions	Total neurite length (µm)				Conditions	Total nurites per cells (µm)
	N1	N2	N3			N1	N2	N3
0 ng/ml BDNF	12363.5	11101.3	12586.9		0 ng/ml BDNF	557.751	499.561	575.037
5 ng/ml BDNF	22541.1	22817.4	18447.4		5 ng/ml BDNF	302.565	356.194	371.424
20 ng/ml BDNF	21424.1	18879.1	18898.8		20 ng/ml BDNF	345.549	378.002	339.16
Conditions	Total neuronal cells
	N1	N2	N3
0 ng/ml BDNF	22.1667	22.2222	21.8889
5 ng/ml BDNF	74.5	64.0588	49.6667
20 ng/ml BDNF	62	49.9444	55.7222
0 ng/ml BDNF
N1					N2					N3
No.	Total neurite length	Total neuronal cells			No.	Total neurite length	Total neuronal cells			No.	Total neurite length	Total neuronal cells
1	10027.7	30			1	14060.6	29			1	11850.9	15
2	7700.52	5			2	13001.3	33			2	12715.4	26
3	10048	22			3	8291.38	43			3	12299.6	36
4	11512.2	18			4	11954.5	23			4	11703.7	21
5	9025.12	24			5	6484.15	6			5	10738.2	14
6	14714.4	36			6	9628.54	6			6	7792.81	26
7	13219.1	36			7	5431.03	12			7	8935.34	7
8	15769.9	19			8	10421.1	20			8	9748.07	8
9	14774.7	17			9	8408.23	22			9	15807	37
10	16503.6	21			10	11893.3	18			10	13978	31
11	14435.2	27			11	9156.14	18			11	15991.5	34
12	13942.6	21			12	12713.8	25			12	18262.9	25
13	12027.3	21			13	13669.6	12			13	14478.8	20
14	12619.3	24			14	12006.8	26			14	13005.2	22
15	11066.3	25			15	11969.1	19			15	14093.3	21
16	12033.1	26			16	9791.89	32			16	11049.2	22
17	10565.3	17			17	15545.3	26			17	13333.2	6
18	12558.4	10			18	15397.4	30			18	10781.5	23
Average	12363.5	22.1667			Average	11101.3	22.2222			Average	12586.9	21.8889
5 ng/ml BDNF
N1					N2					N3
No.	Total neurite length	Total neuronal cells			No.	Total neurite length	Total neuronal cells			No.	Total neurite length	Total neuronal cells
1	24145.4	73			1	17025.9	33			1	24655.9	60
2	21544.3	83			2	29048.7	48			2	18828.7	36
3	31314	96			3	22314.4	35			3	19473.9	79
4	18118.7	66			4	22294.3	29			4	26989.7	65
5	20478.5	88			5	25246.1	76			5	17584.8	20
6	20482.3	68			6	28542.6	92			6	21031.7	53
7	20742.5	65			7	20204.9	45			7	15692.2	35
8	34627.2	118			8	25223.2	127			8	13499.8	53
9	13816.8	53			9	23019.3	95			9	15717.7	33
10	23992.4	50			10	21442	71			10	20787.5	62
11	22892.8	47			11	22755.9	53			11	14699	67
12	23037.6	57			12	20798.2	117			12	14228.7	22
13	23252	87			13	18963.1	33			13	14811.1	41
14	24286.3	76			14	28258.2	58			14	22060.1	45
15	20251.7	70			15	21701.7	47			15	19648.3	67
16	22185	66			16	21230.2	83			16	17853.2	64
17	24987.6	70			17	19826.6	47			17	21940.3	55
18	15584.7	108			18	22817.3	64			18	12550.1	37
Average	22541.1	74.5			Average	22817.4	64.0556			Average	18447.4	49.6667
20 ng/ml BDNF
N1					N2					N3
No.	Total neurite length	Total neuronal cells			No.	Total neurite length	Total neuronal cells			No.	Total neurite length	Total neuronal cells
1	18943.2	48			1	20891.3	28			1	16314.2	32
2	28699.4	118			2	19439.7	37			2	18182.5	60
3	17940.4	44			3	15523.7	63			3	20893.3	116
4	19268.3	31			4	21160	30			4	24667.2	136
5	18725.4	30			5	30207.4	132			5	17028.4	32
6	27057.1	53			6	16721	41			6	18748.6	57
7	18681.3	41			7	17927.4	58			7	14768.2	40
8	15839.9	51			8	19242.4	51			8	11481.7	22
9	26210.5	66			9	21228.3	29			9	15690.6	45
10	16660.2	44			10	19705.6	30			10	15727.7	43
11	21319.7	63			11	17797.6	40			11	19830.8	61
12	17725.8	22			12	15472.5	40			12	15963.8	42
13	26343.8	127			13	15271	17			13	14363.8	31
14	21962.3	109			14	17500.3	51			14	20425.8	50
15	21289.1	49			15	15090.6	62			15	31946.5	119
16	18566.8	56			16	18687.6	74			16	26849.6	53
17	22640.3	79			17	18323.3	41			17	18660.4	35
18	27759.6	85			18	19634.2	75			18	18634.6	29
Average	21424.1	62			Average	18879.1	49.9444			Average	18898.8	55.7222

## Sheet: Neurite length (fAD1)
fAD1
Conditions	Total neurite length (µm)				Conditions	Total nurites per cells (µm)
	N1	N2	N3			N1	N2	N3
0 ng/ml BDNF	8094.42	7926.77	8695.33		0 ng/ml BDNF	413.919	440.376	358.981
5 ng/ml BDNF	13089.4	14631.4	14205.6		5 ng/ml BDNF	312.065	336.355	375.479
20 ng/ml BDNF	13851	14858.1	13949		20 ng/ml BDNF	380.639	318.01	468.437
conditions	Total neuronal cells
	N1	N2	N3
0 ng/ml BDNF	19.5556	18	24.2222
5 ng/ml BDNF	41.9444	43.5	37.8333
20 ng/ml BDNF	36.3889	46.7222	29.7778
0 ng/ml BDNF
N1					N2					N3
No.	Total neurite length	Total neuronal cells			No	Total neurite length	Total neuronal cells			No.	Total neurite length	Total neuronal cells
1	7685.7	32			1	8644.16	5			1	10095.9	32
2	9067.21	8			2	8719.62	12			2	10567.2	26
3	9556.77	17			3	10141.6	24			3	9484.14	6
4	7274.53	20			4	8409.74	16			4	9191.59	11
5	8065.15	12			5	6924.53	21			5	11331.2	15
6	9234.11	10			6	8445.3	23			6	8855.45	29
7	8945.08	7			7	8495.28	15			7	8435.19	42
8	6819.2	12			8	7030.86	8			8	8881.16	25
9	7901.18	24			9	5750.62	6			9	8728.94	50
10	6176.75	21			10	11372.8	45			10	10021.6	11
11	8379.42	17			11	5557.03	4			11	9171.98	50
12	8795.91	34			12	7084.43	11			12	7661.34	15
13	8063.58	37			13	9250.47	22			13	8073.82	7
14	7857.27	19			14	8940.54	29			14	8808.61	23
15	8922.35	17			15	7917.89	24			15	6771.92	8
16	9353.4	16			16	7317.17	22			16	6281.47	25
17	6947.25	21			17	5534.21	15			17	6439.77	39
18	6654.61	28			18	7145.67	22			18	7714.74	22
Average	8094.42	19.5556			Average	7926.77	18			Average	8695.33	24.2222
5 ng/ml BDNF
N1					N2					N3
No.	Total neurite length	Total neuronal cells			No	Total neurite length	Total neuronal cells			No.	Total neurite length	Total neuronal cells
1	12202.8	25			1	12430.9	11			1	9469.23	17
2	13174.3	49			2	13005.9	51			2	15075.7	47
3	11723.4	24			3	12646.7	18			3	10897.8	70
4	13407.9	26			4	12992	31			4	10300.2	20
5	10615.5	18			5	13594.8	47			5	13827	23
6	12689.4	27			6	14965.8	67			6	18736.4	94
7	15024.2	38			7	12910.7	53			7	15161.3	25
8	10667.7	66			8	15798.2	55			8	12846.2	21
9	11051.7	50			9	15051.9	55			9	9057.76	13
10	12513.7	56			10	15184.5	16			10	10403.6	39
11	12052.4	29			11	12450	22			11	18286	57
12	17292	64			12	17020.2	56			12	13006.6	26
13	11625.4	35			13	18615.3	104			13	17753.9	38
14	15144.2	45			14	16776.6	30			14	14093.9	38
15	14404.7	40			15	16683.9	67			15	11052.5	29
16	13079.6	58			16	14428.1	37			16	17322.2	35
17	15213	60			17	13274.6	29			17	16022.2	36
18	13727.2	45			18	15535.9	34			18	22388.4	53
Average	13089.4	41.9444			Average	14631.4	43.5			Average	14205.6	37.8333
20 ng/ml BDNF
N1					N2					N3
No.	Total neurite length	Total neuronal cells			No	Total neurite length	Total neuronal cells			No.	Total neurite length	Total neuronal cells
1	12821.4	39			1	15791.2	42			1	12087	14
2	16119.8	55			2	10899.7	28			2	14732.5	15
3	14220.2	44			3	20021.7	109			3	17632.9	24
4	13164.5	33			4	16129.5	57			4	15906	31
5	12641.9	39			5	12166.5	36			5	10965.8	19
6	11621.9	32			6	14772	39			6	10726.7	20
7	18325.5	55			7	11775.9	84			7	11857.2	24
8	12565.4	37			8	15891.6	31			8	13466.1	30
9	17080.1	51			9	18189	85			9	13476.6	29
10	10964.7	33			10	16607.7	43			10	13529.5	29
11	12777.4	41			11	13227.9	27			11	13255.7	20
12	14350.7	32			12	15664.5	30			12	12575.5	23
13	17877.6	35			13	14853.4	30			13	18091.1	37
14	12517.4	30			14	13856	43			14	14133.6	67
15	14672.4	27			15	12130.6	32			15	14952.3	39
16	11784.9	11			16	12104.7	30			16	14658.5	43
17	12866.8	33			17	18655.9	30			17	13633.3	39
18	12946.1	28			18	14708.7	65			18	15402.2	33
Average	13851	36.3889			Average	14858.1	46.7222			Average	13949	29.7778
